# Supplementary material for: Causal Associations of Obesity With the Intervertebral Degeneration, Low Back Pain, and Sciatica: A Two-Sample Mendelian Randomization Study
Source: Front Endocrinol (Lausanne). 2021 Dec 8;12:740200. doi: 10.3389/fendo.2021.740200 (PMC8692291; doi:10.3389/fendo.2021.740200)
Supplement: Supplementary Table 2 — Data source and detailed information of the included outcomes. [file Table_2.xlsx]

## Sheet: Sheet1
Outcomes	Consortium	ID	Cases	Control	Sample size	Population	Definition/inclusion criteria	Adjustments	Total Observed scale h2 (SE)
IVDD	Finngen (R4)	M13_INTERVERTEB	15565	134889	150454	European	ICD-10M51, ICD-9 722, ICD-8 725; excluded ICD-9 7220|7224|7227|7228Av, ICD-87250	sex, age, 10 PCs, genotyping batch	0.0275 (0.0039)
Sciatica	Finngen (R4)	M13_SCIATICA	6827	134889	141716	European	ICD-10M54.3, M54.4, ICD-8 7170	sex, age, 10 PCs, genotyping batch
LBP	Finngen (R4)	M13_LOWBACKPAIN	9917	134889	144806	European	ICD-10M54.5, ICD-9 7242, ICD-8 72870	sex, age, 10 PCs, genotyping batch	0.0183 (0.0034)
Detailed information about ancestry assignment, cohort description, genotyping/imputation and association analyses can be obtained from Finngen consortium website (https://finngen.gitbook.io/documentation/releases)
